# Supplementary material for: Phylogeographic structure of Italian Formica pratensis (Retzius 1783) populations in the framework of the species Eurasian range
Source: Springer Nature journal article supplement (doi:10.1007/s00040-024-00999-8), 2024-10-05
Supplement: MOESM2 [file 40_2024_999_MOESM2_ESM.docx]

Supplementary:

**Tab S1**

| **Gene** | **Primer** | **Primer sequence (5' to 3')** | **T° ann.** | **Source** |
| --- | --- | --- | --- | --- |
| Goro1 | Cytb-Fe | GTTTAATTTCTAATGAAC | 41°C | Liautard & Keller 2001 |
|  | CB-11449 | GTAATTACAGTTGCTCCT | 46°C | Goropashnaya et al. 2004 |
| Goro2 | CB1 | TATGTACTACCATGAGGACAAATATC | 57°C | Jermiin & Crozier 1994 |
|  | tRs | TATTTCTTTATTATGTTTTCAAAAC | 52°C | Jermiin & Crozier 1994 |
